# Supplementary material for: Effect of Fungi on Metabolite Changes in Kimchi During Fermentation
Source: PubMed Central journal article supplement (PMC7663158; doi:10.3390/molecules25215040), 2020-10-30
Supplement: molecules-25-05040-s001.pdf [file molecules-25-05040-s001.pdf]

# Effect of fungi on metabolite changes in kimchi during fermentation

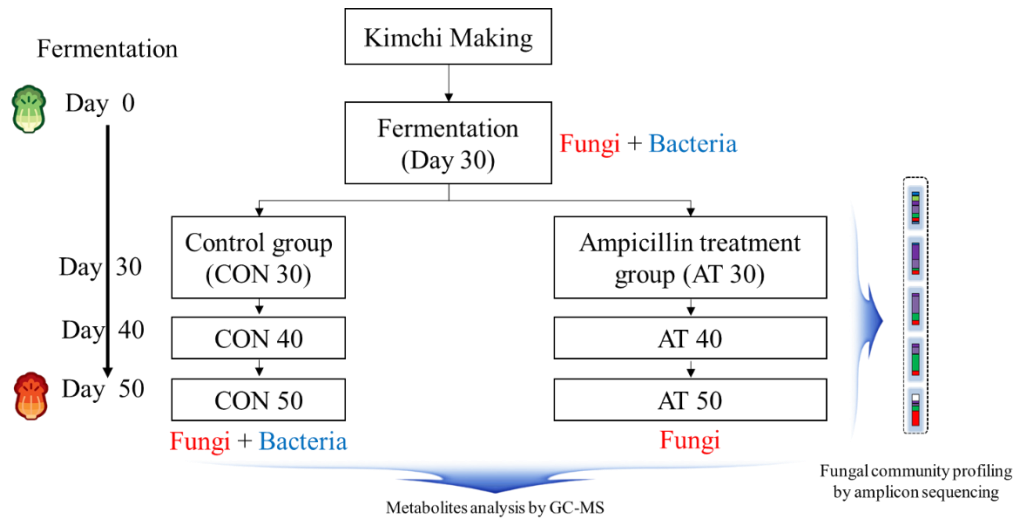

Based on the pattern of change of each metabolite, it was grouped into four categories

- 1) If  $CON\ 30 \neq CON\ 50$  and  $CON\ 30 \neq AT\ 50$  and  $AT\ 50 = CON\ 50$  → **Fungi** related metabolites
- 2) If  $CON\ 30 \neq CON\ 50$  and  $CON\ 30 \neq AT\ 50$  and  $AT\ 50 \neq CON\ 50$  → **Fungi + Bacteria** related metabolites
- 3) If  $CON\ 30 \neq CON\ 50$  and  $CON\ 30 = AT\ 50$  and  $AT\ 50 \neq CON\ 50$  → **Bacteria** related metabolites
- 4) If  $CON\ 30 = CON\ 50$  and  $CON\ 30 \neq AT\ 50$  and  $AT\ 50 \neq CON\ 50$  → **Undetermined**

Symbols (=) and ( $\neq$ ) indicate significantly different and not significantly different, respectively.

**Figure S1:** Schematic diagram of this study.
